# Supplementary material for: HR23B pathology preferentially co-localizes with p62, pTDP-43 and poly-GA in C9ORF72-linked frontotemporal dementia and amyotrophic lateral sclerosis
Source: Springer Nature journal article supplement (doi:10.1186/s40478-019-0694-6), 2019-03-13

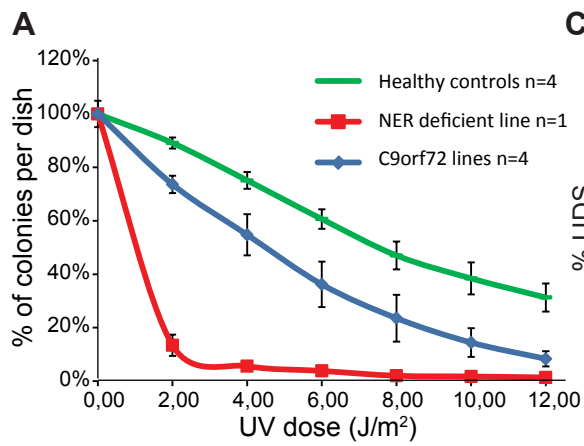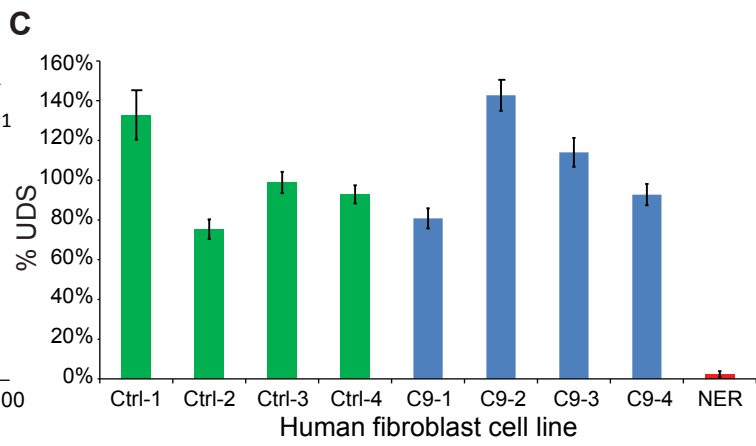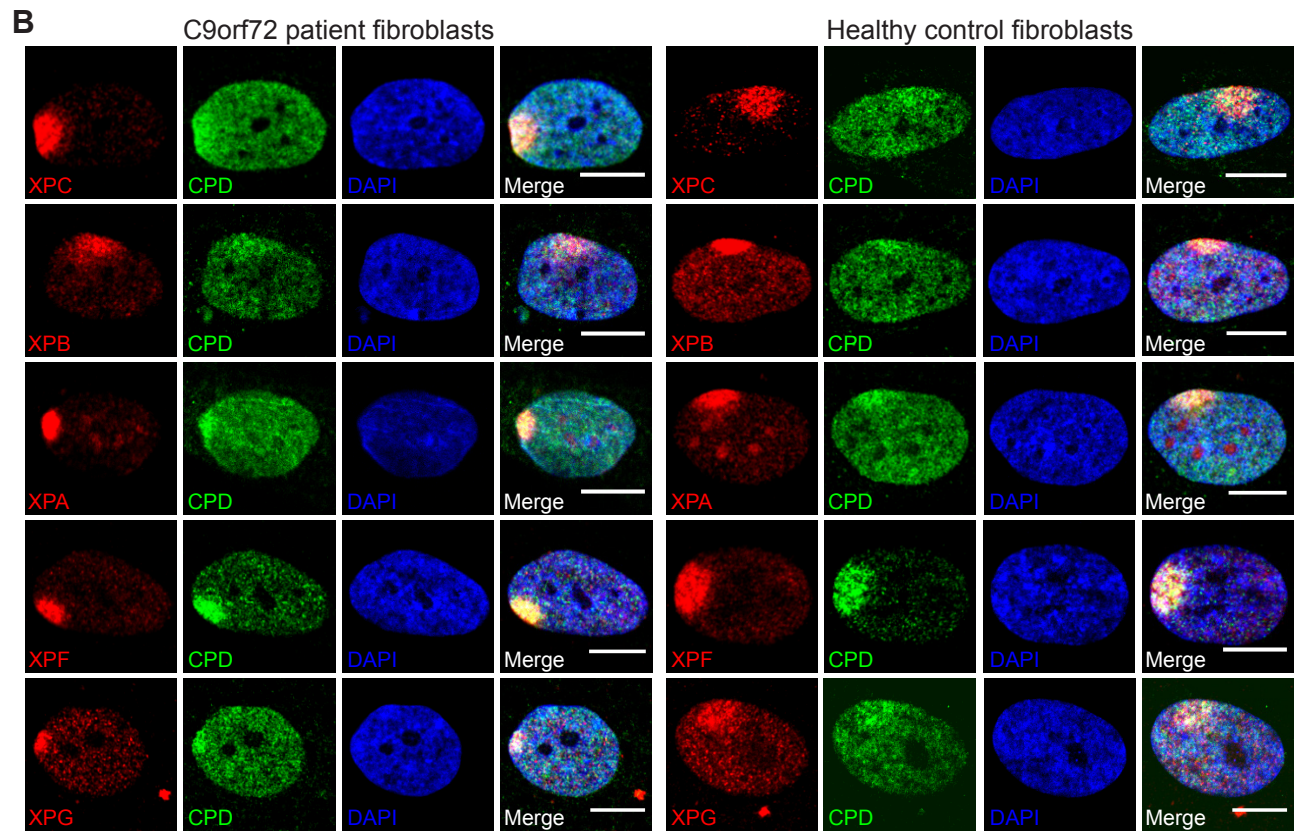

Supplement: MOESM10 [file 25666708]
